# Supplementary material
Source: MDPI journal article supplement (https://www.mdpi.com/2571-9408/5/4/154)
Supplement: s1 [file s1]

Archive with 1 entries (1 files):
- Supp;ementTimberHeritage2.pdf
