# Supplementary material
Source: MDPI journal article supplement (https://www.mdpi.com/2571-9408/5/4/154)
Supplement: s1 [file s1 › Supp;ementTimberHeritage2.pdf]

## Supplementary material

Table S1: Copyright information for Fig.1

Outline maps from [d-maps.com](https://d-maps.com)

Images:

(b) Grant Wood - 5QEPm0jCc183Aw at Google Cultural Institute (

c) Original uploader was Jehjoyce at en.wikipedia - Transferred from en.wikipedia

(d) <https://www.english-heritage.org.uk/visit/places/harmondsworth-barn/>

(g) Sierra Leone house Freetown | Out and about in Freetown, Free For All tour Nov ... | Flickr)

(k) Punjabi Barracks: original uploader was Matthew A. Lockhart at English Wikipedia. - Transferred from en.wikipedia to Commons., CC BY 2.5, <https://commons.wikimedia.org/w/index.php?curid=32100853>

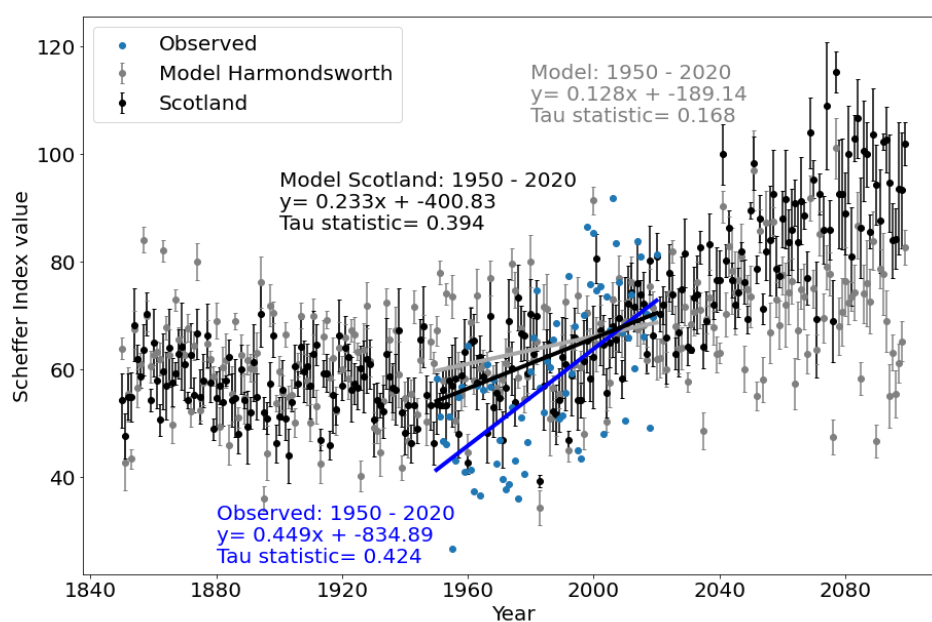

Figure S1. Scheffer index for Harmondsworth and Scotland calculated using (i) observed daily data from Heathrow, UK (blue); (ii) modelled daily data from the HadGEM3-GC31-MM for Harmondsworth (grey); and modelled daily data from the HadGEM3-GC31-MM for Scotland (black). The modelled data is the mean of values from the nine grid cells centred on Heathrow and central Scotland, with error bars showing one standard deviation from the mean. Theil-Sen trendlines are fitted for 1950–2020.

Table S2: Optimum climate conditions for organisms, based on English Heritage (2012) *Practical Building Conservation. Timber*.

|                       | Temperature (°C) | Relative humidity (%) |
|-----------------------|------------------|-----------------------|
| Powderpost Beetle     | 15 - 30          | > 45                  |
| House longhorn beetle | 20 - 30          | 70 - 80               |
| Death-watch beetle    | >10              | > 77                  |
| Dry rot               | 17 - 23          | > 80                  |
| Cellar rot            | 20 - 32          | > 75                  |
| Oak rot               | 20 - 30          | > 80                  |

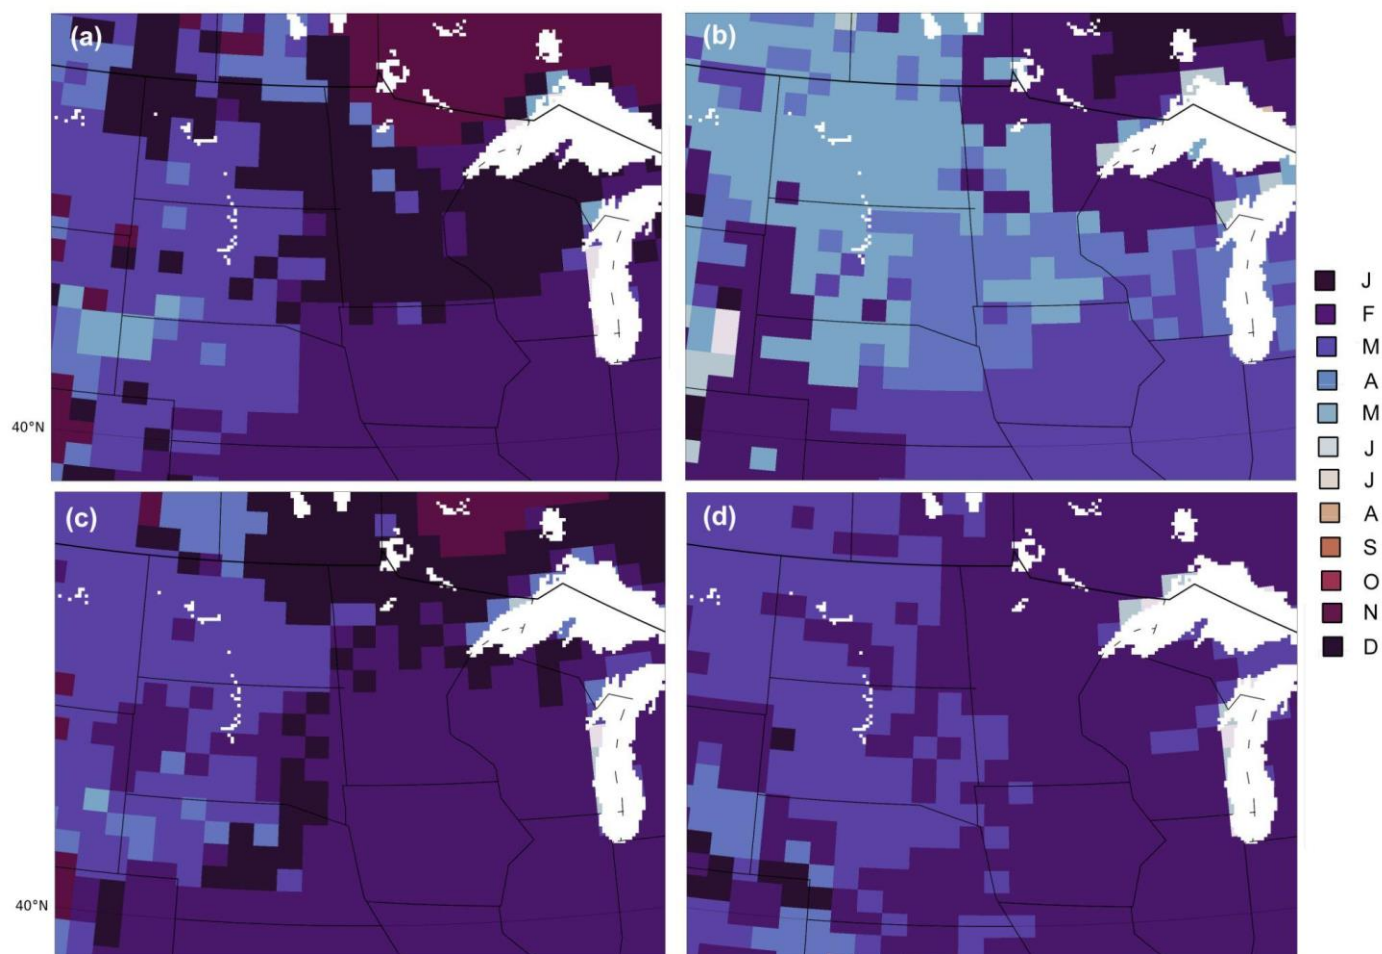

**Figure S2.** Modal month with the maximum monthly RH in the American Midwest for the periods (a) 1850-1879, (b) 1984-2013, (c) 2025-2054 and (d) 2070-2099.

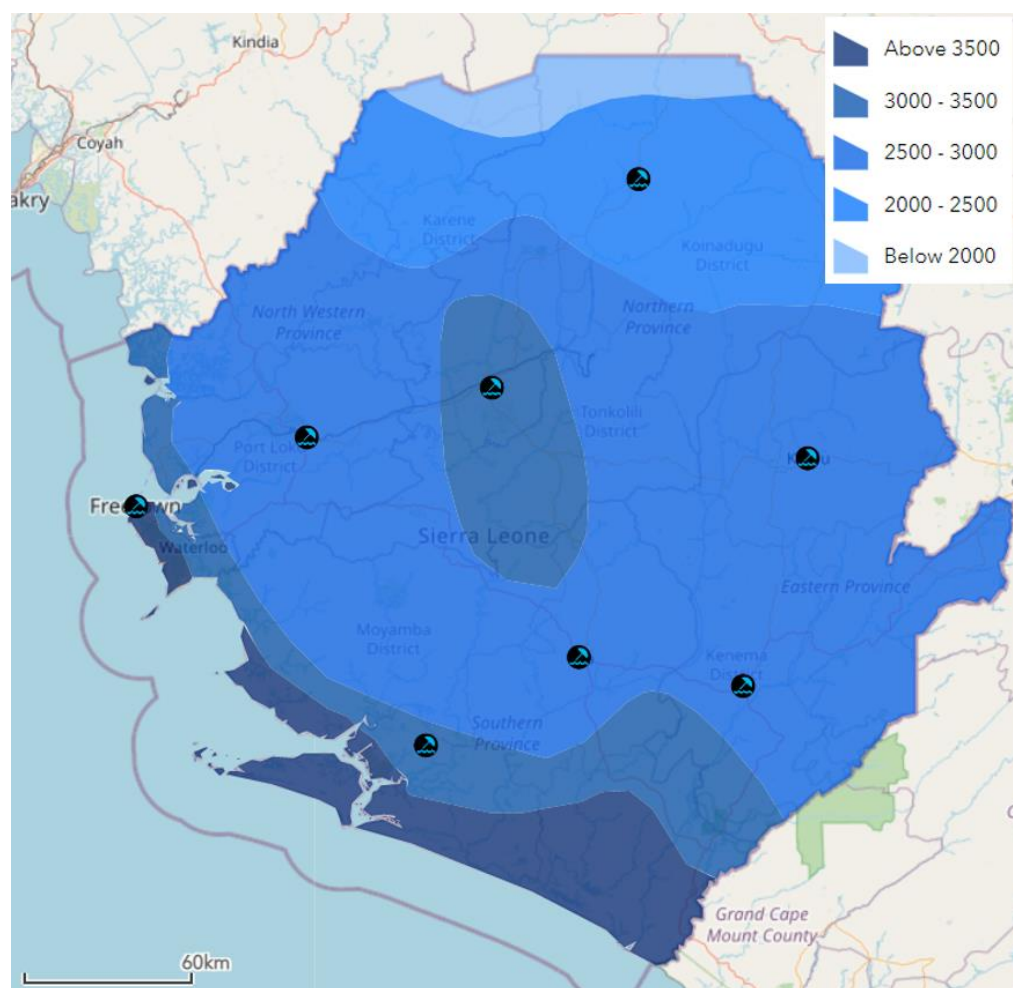

Figure S3: Isobar map of average annual rainfall (mm) in Sierra Leone sourced from the Sierra Leone Meteorological Agency (<https://slmet.gov.sl/our-services/cidmews-mapping-application>). The location of the eight automatic weather stations are shown with black circles.
